# Supplementary material for: Discovery of Synergistic Drug Combinations for Colorectal Cancer Driven by Tumor Barcode Derived from Metabolomics “Big Data”
Source: MDPI journal article supplement (doi:10.3390/metabo12060494), 2022-05-30
Supplement: s1 [file s1]

**Table S1 List of potential oncometabolites in blood sample**

| <b>Name</b>           | <b>KEGG ID</b> | <b>Fre</b> | <b>Up</b> | <b>Down</b> | <b>Sum-Con</b> | <b>Sum-CRC</b> | <b>BF</b> |
|-----------------------|----------------|------------|-----------|-------------|----------------|----------------|-----------|
| Pyruvic acid          | C00022         | 8          | 7         | 1           | 484            | 518            | 50.20     |
| Acetic acid           | C00033         | 4          | 4         | 0           | 205            | 266            | 31.00     |
| L-Malic acid          | C00149         | 3          | 3         | 0           | 125            | 154            | 15.00     |
| 2-Hydroxybutyric acid | C05984         | 3          | 3         | 0           | 187            | 186            | 15.00     |
| L-Phenylalanine       | C00079         | 8          | 6         | 2           | 1557           | 809            | 10.13     |
| L-Isoleucine          | C00407         | 5          | 4         | 1           | 389            | 367            | 8.14      |
| Elaidic acid          | C00712         | 5          | 4         | 1           | 217            | 272            | 8.14      |
| L-Proline             | C00148         | 7          | 5         | 2           | 403            | 448            | 5.92      |
| 3-Hydroxybutyric acid | C01089         | 7          | 5         | 2           | 265            | 389            | 5.92      |
| Myoinositol           | C00137         | 4          | 3         | 1           | 376            | 382            | 4.33      |
| L-Arginine            | C00062         | 4          | 3         | 1           | 1162           | 312            | 4.33      |
| Fumaric acid          | C00122         | 4          | 3         | 1           | 269            | 216            | 4.33      |
| D-Fructose            | C02336         | 4          | 3         | 1           | 399            | 374            | 4.33      |
| L-Cystine             | C00491         | 4          | 3         | 1           | 431            | 380            | 4.33      |
| Glycine               | C00037         | 6          | 4         | 2           | 389            | 400            | 3.41      |
| L-Lactic acid         | C00186         | 8          | 5         | 3           | 676            | 686            | 2.94      |
| Pyroglutamic acid     | C01879         | 3          | 2         | 1           | 115            | 118            | 2.20      |
| D-Glutamic acid       | C00217         | 3          | 2         | 1           | 177            | 150            | 2.20      |
| Glycocholic acid      | C01921         | 3          | 2         | 1           | 147            | 127            | 2.20      |
| Glyceric acid         | C00258         | 3          | 2         | 1           | 376            | 352            | 2.20      |
| L-Glutamic acid       | C00025         | 3          | 2         | 1           | 172            | 145            | 2.20      |
| L-Aspartic acid       | C00049         | 5          | 3         | 2           | 289            | 235            | 1.91      |
| Glycerol              | C00116         | 7          | 4         | 3           | 562            | 610            | 1.75      |
| D-Glucose             | C00031         | 4          | 2         | 2           | 226            | 192            | 1.00      |
| Stearic acid          | C01530         | 4          | 2         | 2           | 336            | 368            | 1.00      |
| Linoleic acid         | C01595         | 4          | 2         | 2           | 463            | 386            | 1.00      |
| L-Asparagine          | C00152         | 4          | 2         | 2           | 1137           | 340            | 1.00      |
| Citric acid           | C00158         | 6          | 3         | 3           | 500            | 548            | 1.00      |
| Urea                  | C00086         | 4          | 2         | 2           | 293            | 335            | 1.00      |
| L-Alanine             | C00041         | 7          | 3         | 4           | 562            | 610            | -1.75     |
| Creatinine            | C00791         | 5          | 2         | 3           | 289            | 235            | -1.91     |
| L-Methionine          | C00073         | 5          | 2         | 3           | 1229           | 406            | -1.91     |
| Palmitic acid         | C00249         | 3          | 1         | 2           | 316            | 322            | -2.20     |

| <b>Name</b>      | <b>KEGG ID</b> | <b>Fre</b> | <b>Up</b> | <b>Down</b> | <b>Sum-Con</b> | <b>Sum-CRC</b> | <b>BF</b> |
|------------------|----------------|------------|-----------|-------------|----------------|----------------|-----------|
| Oleamide         | C19670         | 3          | 1         | 2           | 179            | 178            | -2.20     |
| 4-Hydroxyproline | C01157         | 3          | 1         | 2           | 187            | 186            | -2.20     |
| Uric acid        | C00366         | 3          | 1         | 2           | 207            | 154            | -2.20     |
| Ribitol          | C00474         | 3          | 1         | 2           | 122            | 152            | -2.20     |
| Deoxyuridine     | C00526         | 3          | 1         | 2           | 207            | 154            | -2.20     |
| L-Histidine      | C00135         | 6          | 2         | 4           | 1284           | 434            | -3.41     |
| L-Serine         | C00065         | 4          | 1         | 3           | 142            | 171            | -4.33     |
| L-Threonine      | C00188         | 4          | 1         | 3           | 1120           | 353            | -4.33     |
| Citrulline       | C00327         | 4          | 1         | 3           | 1175           | 351            | -4.33     |
| L-Tyrosine       | C00082         | 7          | 2         | 5           | 1540           | 792            | -5.92     |
| L-Tryptophan     | C00078         | 7          | 2         | 5           | 1257           | 462            | -5.92     |
| Ornithine        | C00077         | 5          | 1         | 4           | 1202           | 404            | -8.14     |
| L-Leucine        | C00123         | 6          | 1         | 5           | 1306           | 551            | -15.00    |
| L-Lysine         | C00047         | 6          | 1         | 5           | 1521           | 647            | -15.00    |
| Creatine         | C00300         | 3          | 0         | 3           | 186            | 228            | -15.00    |
| L-Valine         | C00183         | 7          | 1         | 6           | 1306           | 581            | -27.44    |
| L-Glutamine      | C00064         | 6          | 0         | 6           | 1333           | 553            | -127.00   |

*Fre* represents frequency. *Up* represents numbers of studies reported the metabolite up-regulated. *Down* represents numbers of studies reported the metabolite down-regulated. *Sum-Con* represents cumulative control sample size, *Sum-CRC* represents cumulative CRC sample size. BF represents Bayesian Factors, in which positive (+) represents an up-regulation and negative (-) represents a down-regulation.

**Table S2 List of potential oncometabolites in tissue samples**

| <b>Name</b>               | <b>KEGG ID</b> | <b>Fre</b> | <b>Up</b> | <b>Down</b> | <b>Sum-Con</b> | <b>Sum-CRC</b> | <b>BF</b> |
|---------------------------|----------------|------------|-----------|-------------|----------------|----------------|-----------|
| Taurine                   | C00245         | 8          | 8         | 0           | 202            | 202            | 511       |
| L-Lactic acid             | C00186         | 10         | 9         | 1           | 270            | 270            | 169.67    |
| Hypoxanthine              | C00262         | 6          | 6         | 0           | 123            | 123            | 127       |
| L-Proline                 | C00148         | 6          | 6         | 0           | 137            | 137            | 127       |
| L-Aspartic acid           | C00049         | 6          | 6         | 0           | 195            | 195            | 127       |
| L-Phenylalanine           | C00079         | 5          | 5         | 0           | 170            | 170            | 63        |
| Uracil                    | C00106         | 5          | 5         | 0           | 181            | 181            | 63        |
| Glycine                   | C00037         | 8          | 7         | 1           | 219            | 219            | 50.2      |
| Palmitic acid             | C00249         | 4          | 4         | 0           | 83             | 83             | 31        |
| L-Alanine                 | C00041         | 4          | 4         | 0           | 147            | 147            | 31        |
| L-Leucine                 | C00123         | 4          | 4         | 0           | 122            | 122            | 31        |
| L-Arginine                | C00062         | 4          | 4         | 0           | 73             | 73             | 31        |
| Glutathione               | C00051         | 4          | 4         | 0           | 100            | 100            | 31        |
| L-Cysteine                | C00097         | 4          | 4         | 0           | 125            | 125            | 31        |
| Choline                   | C00114         | 4          | 4         | 0           | 132            | 132            | 31        |
| Carnitine                 | C00487         | 4          | 4         | 0           | 66             | 66             | 31        |
| Stearic acid              | C01530         | 3          | 3         | 0           | 74             | 74             | 15        |
| L-Valine                  | C00183         | 3          | 3         | 0           | 113            | 113            | 15        |
| L-Threonine               | C00188         | 3          | 3         | 0           | 86             | 86             | 15        |
| L-Isoleucine              | C00407         | 3          | 3         | 0           | 113            | 113            | 15        |
| D-Glutamic acid           | C00217         | 3          | 3         | 0           | 116            | 116            | 15        |
| L-Tyrosine                | C00082         | 3          | 3         | 0           | 108            | 108            | 15        |
| Phosphoric acid           | C00009         | 3          | 3         | 0           | 96             | 96             | 15        |
| Uridine                   | C00299         | 3          | 3         | 0           | 73             | 73             | 15        |
| Myristic acid             | C06424         | 3          | 3         | 0           | 74             | 74             | 15        |
| Scyllitol                 | C06153         | 4          | 3         | 1           | 142            | 142            | 4.33      |
| Adenine                   | C00147         | 4          | 3         | 1           | 61             | 61             | 4.33      |
| L-Asparagine              | C00152         | 4          | 3         | 1           | 133            | 133            | 4.33      |
| Inosine                   | C00294         | 4          | 3         | 1           | 102            | 102            | 4.33      |
| Glycerophosphochol<br>ine | C00670         | 3          | 2         | 1           | 111            | 111            | 2.2       |
| L-Methionine              | C00073         | 3          | 2         | 1           | 62             | 62             | 2.2       |

|                           |        |   |   |   |     |     |        |
|---------------------------|--------|---|---|---|-----|-----|--------|
| L-Alpha-aminobutyric acid | C02356 | 3 | 2 | 1 | 65  | 65  | 2.2    |
| Succinic acid             | C00042 | 3 | 2 | 1 | 67  | 67  | 2.2    |
| Aminoadipic acid          | C00956 | 3 | 2 | 1 | 71  | 71  | 2.2    |
| Glycerol                  | C00116 | 3 | 2 | 1 | 74  | 74  | 2.2    |
| Ornithine                 | C00077 | 4 | 2 | 2 | 85  | 85  | 1      |
| Fumaric acid              | C00122 | 3 | 1 | 2 | 78  | 78  | -2.2   |
| (R)-Malate                | C00497 | 4 | 1 | 3 | 90  | 90  | -4.33  |
| Myoinositol               | C00137 | 4 | 1 | 3 | 89  | 89  | -4.33  |
| D-Mannose                 | C00159 | 3 | 0 | 3 | 74  | 74  | -15    |
| Citric acid               | C00158 | 3 | 0 | 3 | 36  | 36  | -15    |
| D-Galactose               | C00124 | 7 | 1 | 6 | 154 | 154 | -27.44 |
| D-Glucose                 | C00031 | 7 | 0 | 7 | 164 | 164 | -255   |

*Fre* represents frequency. *Up* represents numbers of studies reported the metabolite up-regulated. *Down* represents numbers of studies reported the metabolite down-regulated. *Sum-Con* represents cumulative control sample size, *Sum-CRC* represents cumulative CRC sample size. BF represents Bayesian Factors, in which positive (+) represents an up-regulation and negative (-) represents a down-regulation.

**Table S3. Comparison of the performance of random forest and Xgboost in synergism prediction**

|                                      | Random Forest | Xgboost       |
|--------------------------------------|---------------|---------------|
| Specificity                          | 0.887         | 0.839         |
| Sensitivity                          | 0.857         | 0.905         |
| True positive rate                   | 0.837         | 0.792         |
| True negative rate                   | 0.902         | 0.929         |
| Accuracy in 10-fold cross validation | 0.875         | 0.865         |
| Accuracy in test set                 | 0.845         | 0.808         |
| AUC of ROC                           | 0.9067-0.9869 | 0.9292-0.9905 |

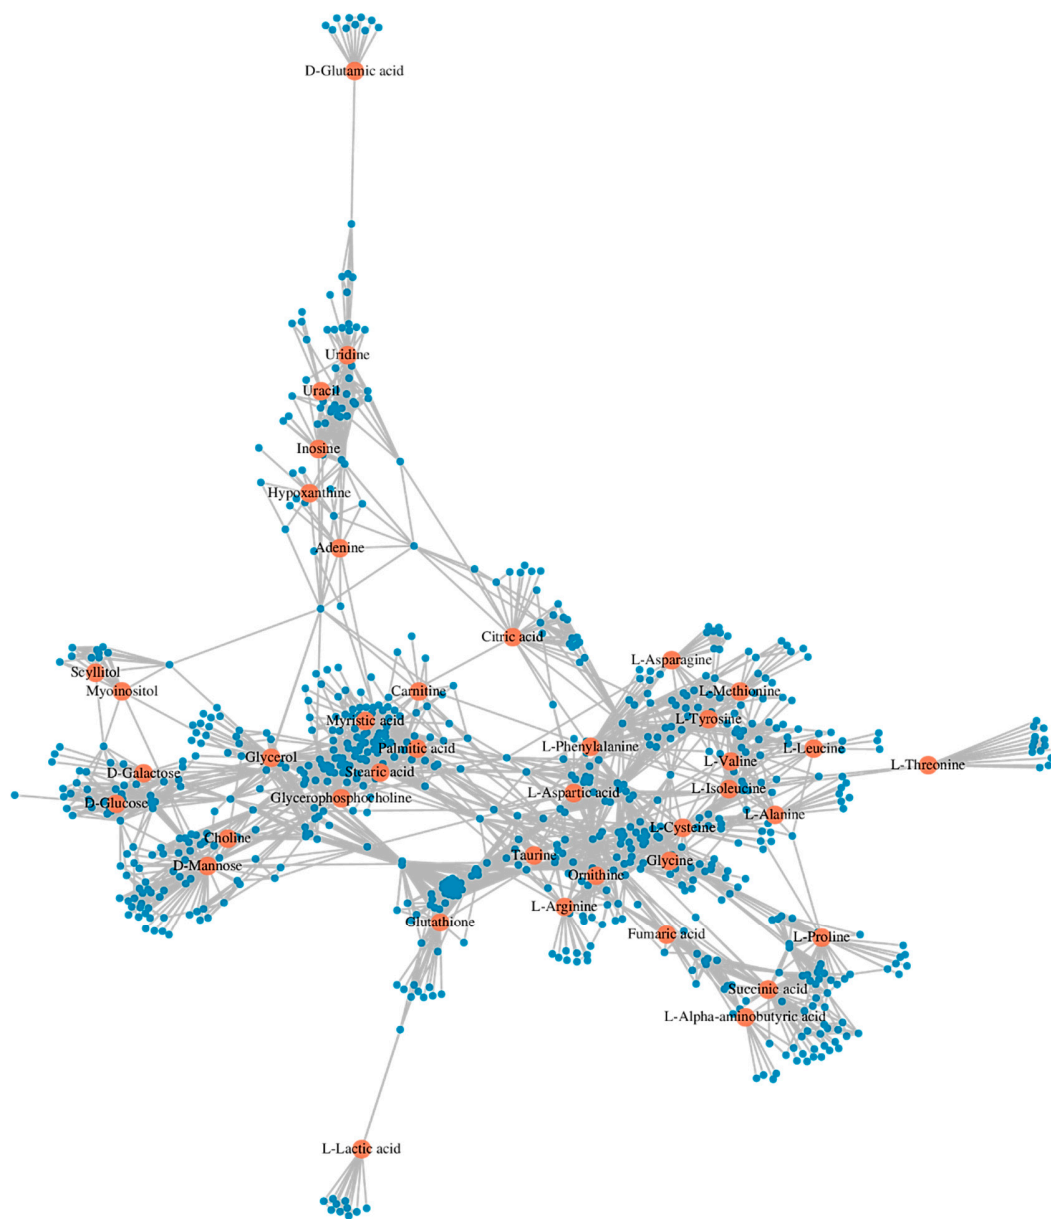

**Figure S1.** The Metabolite-protein network derived from 43 tissue oncometabolites.

Note: isolated islands were removed. In total 804 nodes and 9403 interactions are presented.

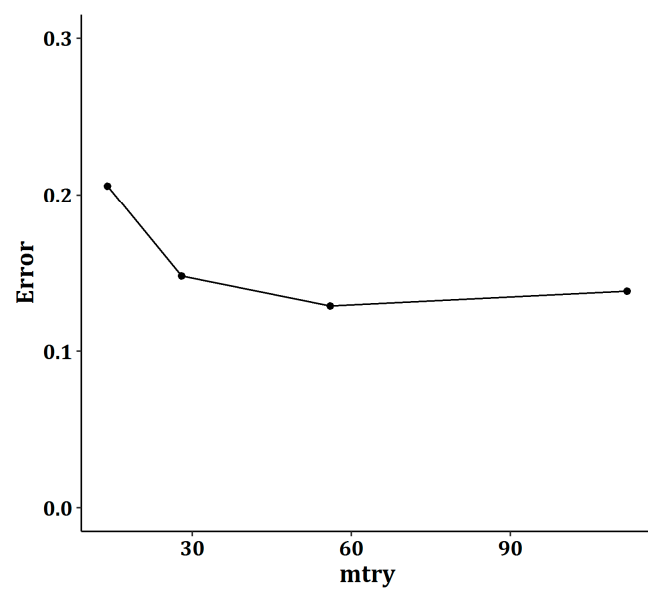

**Figure S2.** Tuning of the parameter of  $mtry$  in random forest.

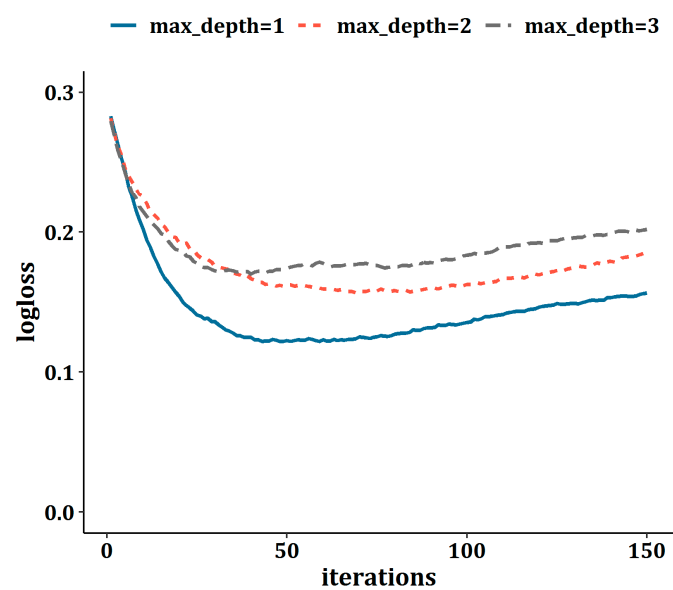

**Figure S3.** Tuning of *max\_depth* and *nround* (iterations) in the Xgboost model.



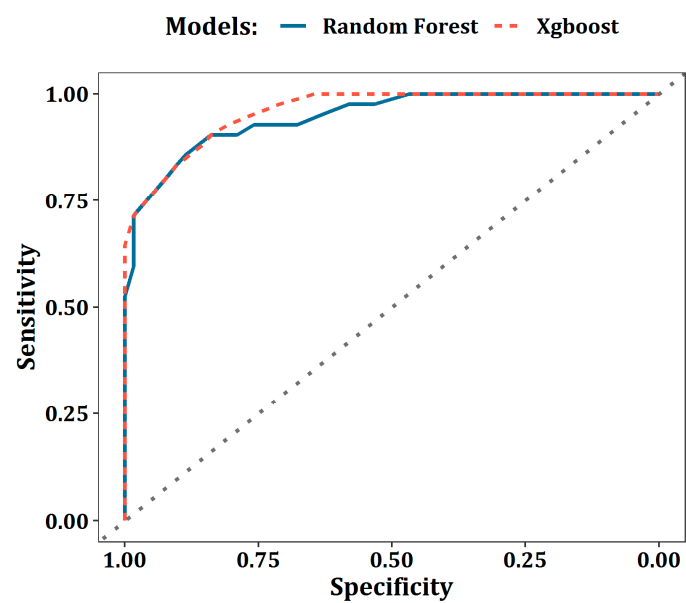

**Figure S4.** ROC plots of random forest and Xgboost models in the synergy prediction.

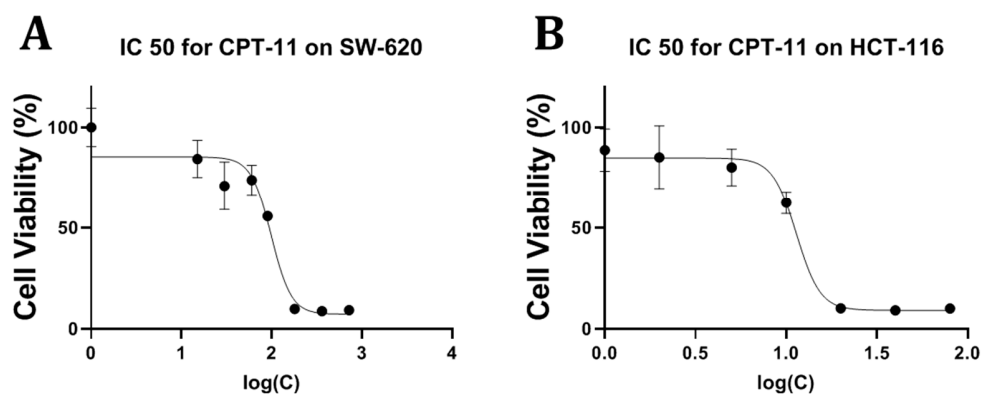

**Figure S5.** Determination of IC<sub>50</sub> of CPT-11 on SW-620 (A) and HCT-116 (B) cell lines.
